# Supplementary material for: The Pseudomonas aeruginosa Complement of Lactate Dehydrogenases Enables Use of d- and l-Lactate and Metabolic Cross-Feeding
Source: PubMed Central journal article supplement (PMC6134097; doi:10.1128/mbio.00961-18), 2018-09-11
Supplement: mbo004184061st1.pdf [file mbo004184061st1.pdf]

**TABLE S1** Strains and plasmids used in this study.

| Strains/plasmids                                                | Number | Used in figures        | Characteristics                                                                                                                                                                                                                                                                             | Source or reference |
|-----------------------------------------------------------------|--------|------------------------|---------------------------------------------------------------------------------------------------------------------------------------------------------------------------------------------------------------------------------------------------------------------------------------------|---------------------|
| <i>Pseudomonas aeruginosa</i>                                   |        |                        |                                                                                                                                                                                                                                                                                             |                     |
| PA14                                                            |        | 3, 4, 5, 6, S3, S4, S5 | Clinical isolate UCBPP-PA14                                                                                                                                                                                                                                                                 | (1)                 |
| PA14 $\Delta$ <i>ldhA</i>                                       | LD2729 | 3, 5, S3               | PA14 with a deletion <i>ldhA</i>                                                                                                                                                                                                                                                            | This study          |
| PA14 $\Delta$ <i>lldDE</i>                                      | LD2735 | 3, 4, 5, S3, S4, S5    | PA14 with a deletion <i>lldD-E</i>                                                                                                                                                                                                                                                          | This study          |
| PA14 $\Delta$ <i>lldA</i>                                       | LD2844 | 3, 4, 5, S3, S5        | PA14 with a deletion <i>lldA</i>                                                                                                                                                                                                                                                            | This study          |
| PA14 $\Delta$ <i>lldDE</i> $\Delta$ <i>lldA</i>                 | LD2759 | 3, 4, S5               | PA14 with deletions of <i>lldD-E</i> and <i>lldA</i>                                                                                                                                                                                                                                        | This study          |
| PA14 $\Delta$ <i>lldDE</i> $\Delta$ <i>lldA</i> :: <i>lldDE</i> | LD2904 | 3                      | PA14 $\Delta$ <i>lldDE</i> $\Delta$ <i>lldA</i> with complementation of <i>lldD-E</i>                                                                                                                                                                                                       | This study          |
| PA14 <i>attB</i> ::MCS- <i>gfp</i>                              | LD2820 | 2, 7, S2, S4           | PA14 with MCS- <i>gfp</i> inserted at the <i>attB</i> site using pLD2722 (pSEK103)                                                                                                                                                                                                          | This study          |
| PA14 <i>attB</i> :: <i>ldhAp-gfp</i>                            | LD3095 | S2                     | PA14 with <i>ldhAp-gfp</i> inserted at the <i>attB</i> site using pLD2814 (pSEK103- <i>gacSp</i> )                                                                                                                                                                                          | This study          |
| PA14 <i>attB</i> :: <i>gacSp-gfp</i>                            | LD2815 | 5, 7, S2               | PA14 with <i>gacSp-gfp</i> inserted at the <i>attB</i> site using pLD2814 (pSEK103- <i>gacSp</i> )                                                                                                                                                                                          | This study          |
| PA14 <i>attB</i> :: <i>lldPp-gfp</i>                            | LD2798 | 2, 4, 5, 6, 7, S4      | PA14 with <i>lldPp-gfp</i> inserted at the <i>attB</i> site using pLD2797 (pSEK103- <i>lldPp</i> )                                                                                                                                                                                          | This study          |
| PA14 <i>attB</i> :: <i>lldAp-gfp</i>                            | LD2868 | 2, 4, 5, 6             | PA14 with <i>lldAp-gfp</i> inserted at the <i>attB</i> site using pLD2867 (pSEK103- <i>lldAp</i> )                                                                                                                                                                                          | This study          |
| <i>Escherichia coli</i>                                         |        |                        |                                                                                                                                                                                                                                                                                             |                     |
| UQ950                                                           | LD44   |                        | <i>E. coli</i> DH5 $\alpha$ $\lambda$ ( <i>pir</i> ) strain for cloning; F $\Delta$ ( <i>argF-lac</i> ) 169 $\phi$ 80d <i>lacZ</i> 58( $\Delta$ M15) <i>glnV44</i> (AS) <i>rjbD1 gyrA96</i> (Nal <sup>R</sup> ) <i>recA1 endA1 spoT thi-1 hsdR17 deoR</i> $\lambda$ <i>pir</i> <sup>+</sup> | D. Lies             |
| BW29427                                                         | LD661  |                        | Donor strain for biparental conjugation; <i>thrB1004 pro thi rpsL hsdS lacZ</i> $\Delta$ M15RP4-1360 $\Delta$ ( <i>araBAD</i> )567 $\Delta$ <i>dapA1341</i> ::[ <i>erm pir</i> (wt)]                                                                                                        | B. Wanner           |
| S17-1                                                           | LD2901 |                        | Str <sup>R</sup> , Tp <sup>R</sup> , F <sup>-</sup> RP4-2-Tc::Mu <i>aphA</i> ::Tn7 <i>recA</i> $\lambda$ <i>pir</i> lysogen                                                                                                                                                                 | (2)                 |
| <i>Saccharomyces cerevisiae</i>                                 |        |                        |                                                                                                                                                                                                                                                                                             |                     |
| InvSc1                                                          | LD622  |                        | <i>MATa/MAT<math>\alpha</math> leu2/leu2 trp1-289/trp1-289 ura3-52/ura3-52 his3-<math>\Delta</math>1/his3-<math>\Delta</math>1</i>                                                                                                                                                          | Invitrogen          |
| Plasmids                                                        |        |                        |                                                                                                                                                                                                                                                                                             |                     |
| pMQ30                                                           | LD621  |                        | Yeast-based allelic-exchange vector; <i>sacB</i> <sup>+</sup> , CEN/ARSH, URA3 <sup>+</sup> , Gm <sup>R</sup>                                                                                                                                                                               | (3)                 |
| pLD2728 (pMQ30- $\Delta$ <i>ldhA</i> )                          | LD2728 |                        | $\Delta$ <i>ldhA</i> flanking fragments introduced into pMQ30 by gap repair cloning in yeast strain InvSc1                                                                                                                                                                                  | This study          |
| pLD2734 (pMQ30- $\Delta$ <i>lldDE</i> )                         | LD2734 |                        | $\Delta$ <i>lldDE</i> flanking fragments introduced into pMQ30 by gap repair cloning in yeast strain InvSc1                                                                                                                                                                                 | This study          |
| pLD2758 (pMQ30- $\Delta$ <i>lldA</i> )                          | LD2758 |                        | $\Delta$ <i>lldA</i> flanking fragments introduced into pMQ30 by gap repair cloning in yeast strain InvSc1                                                                                                                                                                                  | This study          |
| pLD2903 (pMQ30- <i>lldDE</i> -comp)                             | LD2903 |                        | <i>lldDE</i> complementation flanking fragments introduced into pMQ30 by gap repair cloning in yeast strain InvSc1                                                                                                                                                                          | This study          |

|                                  |        |  |                                                                                                                                 |            |
|----------------------------------|--------|--|---------------------------------------------------------------------------------------------------------------------------------|------------|
| pYL122                           | LD742  |  | Amp <sup>R</sup> <i>rhlA-gfp</i> transcription fusion in mini-CTX- <i>lacZ</i>                                                  | (4)        |
| pUC18-mini-Tn7                   |        |  | Amp <sup>R</sup> ColE1 replicon mini-Tn7 base vector                                                                            | (5)        |
| pLD844 (pSEK101)                 | LD844  |  | <i>rhlA</i> promoter of pYL122 was removed (XhoI and EcoRI) and replaced with a multiple cloning site (MCS) from pUC18-mini-Tn7 | (6)        |
| pLD2722 (pSEK103)                | LD2722 |  | <i>aacC1</i> (gentamicin resistance cassette) from pMQ30 was inserted at the BspDI site of pLD844                               | (6)        |
| pLD3094 (pSEK103- <i>ldhA</i> p) | LD3094 |  | 494 bp of <i>ldhA</i> promoter sequence inserted at the MCS (SpeI and EcoRI) of pLD2722                                         | This study |
| pLD2814 (pSEK103- <i>gacS</i> p) | LD2814 |  | 297 bp of <i>gacS</i> promoter sequence inserted at the MCS (SpeI and XhoI) of pLD2722                                          | This study |
| pLD2797 (pSEK103- <i>lldP</i> p) | LD2797 |  | 324 bp of <i>lldP</i> promoter sequence inserted at the MCS (SpeI and XhoI) of pLD2722                                          | This study |
| pLD2867 (pSEK103- <i>lldA</i> p) | LD2867 |  | 356 bp of <i>lldA</i> promoter sequence inserted at the MCS (SpeI and XhoI) of pLD2722                                          | This study |
| pFLP2                            | LD743  |  | Site-specific excision vector with <i>cl857</i> -controlled FLP recombinase; <i>sacB</i> <sup>+</sup> , Amp <sup>R</sup>        | (7)        |

1. Rahme LG, Stevens EJ, Wolfort SF, Shao J, Tompkins RG, Ausubel FM. 1995. Common virulence factors for bacterial pathogenicity in plants and animals. *Science* 268:1899–1902.
2. Teng F, Murray BE, Weinstock GM. 1998. Conjugal transfer of plasmid DNA from *Escherichia coli* to enterococci: A method to make insertion mutations. *Plasmid* 39:182–186.
3. Shanks RMQ, Caiazza NC, Hinsa SM, Toutain CM, O'Toole GA. 2006. *Saccharomyces cerevisiae*-based molecular tool kit for manipulation of genes from gram-negative bacteria. *Appl Environ Microbiol* 72:5027–5036.
4. Lequette Y, Greenberg EP. 2005. Timing and localization of rhamnolipid synthesis gene expression in *Pseudomonas aeruginosa* biofilms. *J Bacteriol* 187:37–44.
5. Choi K-H, Gaynor JB, White KG, Lopez C, Bosio CM, Karkhoff-Schweizer RR, Schweizer HP. 2005. A Tn7-based broad-range bacterial cloning and expression system. *Nat Methods* 2:443–448.
6. Lin Y-C, Sekedat MD, Cornell WC, Silva GM, Okegbe C, Price-Whelan A, Vogel C, Dietrich LEP. 2018. Phenazines regulate Nap-dependent denitrification in *Pseudomonas aeruginosa* biofilms. *J Bacteriol* JB.00031-18.
7. Hoang TT, Karkhoff-Schweizer RR, Kutchma AJ, Schweizer HP. 1998. A broad-host-range Flp-FRT recombination system for site-specific excision of chromosomally-located DNA sequences: application for isolation of unmarked *Pseudomonas aeruginosa* mutants. *Gene* 212:77–86.
