# Supplementary material for: The Pseudomonas aeruginosa Complement of Lactate Dehydrogenases Enables Use of d- and l-Lactate and Metabolic Cross-Feeding
Source: PubMed Central journal article supplement (PMC6134097; doi:10.1128/mbio.00961-18), 2018-09-11
Supplement: mbo004184061st2.pdf [file mbo004184061st2.pdf]

**TABLE S2** Primers used in this study.

| Number | Name                  | Sequence                                                       | Used for                                                                             |
|--------|-----------------------|----------------------------------------------------------------|--------------------------------------------------------------------------------------|
| 1087   | attB::gfp-inCheck1    | AGGGCCAATCGATAGAGTTT                                           | To verify the genotype of gfp reporter strains                                       |
| 1088   | attB::gfp-inCheck2    | TCTTCGTGATCTGAAGCCATT                                          | To verify the genotype of gfp reporter strains                                       |
| 1089   | attB::gfp-outCheck1   | TAGAAGAACAGGCGGACGAT                                           | To verify the genotype of gfp reporter strains                                       |
| 1090   | attB::gfp-outCheck2   | AGCATCATCGGTACCCAGTC                                           | To verify the genotype of gfp reporter strains                                       |
| 2072   | $\Delta$ ldhA-yeast1  | ggaattgtgagcggataacaattcacacaggaacagct<br>AAGAGCTGAGCCAGTCGTTT | To make pLD2728 (pMQ30- $\Delta$ ldhA) by gap repair cloning in yeast strain InvSc1  |
| 2073   | $\Delta$ ldhA-yeast2  | atgtgtccagggtggtgtc CTGGAAGCTCTCGCTGTCGTAG                     | To make pLD2728 (pMQ30- $\Delta$ ldhA) by gap repair cloning in yeast strain InvSc1  |
| 2074   | $\Delta$ ldhA-yeast3  | ctacgacagcagagctccag GACACCACCTGGACAACAT                       | To make pLD2728 (pMQ30- $\Delta$ ldhA) by gap repair cloning in yeast strain InvSc1  |
| 2075   | $\Delta$ ldhA-yeast4  | aggcaaatctgtttatcagaccgtctcgcttctgat<br>CTAGGGACGTGGTGGTCAAG   | To make pLD2728 (pMQ30- $\Delta$ ldhA) by gap repair cloning in yeast strain InvSc1  |
| 2076   | $\Delta$ ldhA-check1  | CTCGACAGCCTCCAGGAA                                             | To verify the genotype of $\Delta$ ldhA strains                                      |
| 2077   | $\Delta$ ldhA-check2  | CAGGGTGTAACGGAAATCGT                                           | To verify the genotype of $\Delta$ ldhA strains                                      |
| 2078   | $\Delta$ ldhA-check3  | CTGGACAAGGCCATCGAG                                             | To verify the genotype of $\Delta$ ldhA strains                                      |
| 2079   | $\Delta$ ldhA-check4  | CAGCCACGACAACAGAAAGA                                           | To verify the genotype of $\Delta$ ldhA strains                                      |
| 2088   | $\Delta$ lldDE-yeast1 | ggaattgtgagcggataacaattcacacaggaacagct<br>CCTACAGCTTCGGCGAGAT  | To make pLD2734 (pMQ30- $\Delta$ lldDE) by gap repair cloning in yeast strain InvSc1 |
| 2089   | $\Delta$ lldDE-yeast2 | caccaggtagaccacccc GTAGTCGGTGGAAAGCGGAAAT                      | To make pLD2734 (pMQ30- $\Delta$ lldDE) by gap repair cloning in yeast strain InvSc1 |
| 2090   | $\Delta$ lldDE-yeast3 | atttcgctccaccgactac GGGGTGGTCTACCTGGTG                         | To make pLD2734 (pMQ30- $\Delta$ lldDE) by gap repair cloning in yeast strain InvSc1 |
| 2091   | $\Delta$ lldDE-yeast4 | aggcaaatctgtttatcagaccgtctcgcttctgat<br>TCCGCGGATAGAAATAGAA    | To make pLD2734 (pMQ30- $\Delta$ lldDE) by gap repair cloning in yeast strain InvSc1 |
| 2092   | $\Delta$ lldDE-check1 | ACCCTGTTCTCAAGGTCTG                                            | To verify the genotype of $\Delta$ lldDE strains                                     |
| 2093   | $\Delta$ lldDE-check2 | GTCGTGACGTAGGGCGAATA                                           | To verify the genotype of $\Delta$ lldDE strains                                     |
| 2094   | $\Delta$ lldDE-check3 | GCATGCTGGTGCCTGAC                                              | To verify the genotype of $\Delta$ lldDE strains                                     |
| 2095   | $\Delta$ lldDE-check4 | CAGGCGGTAGACGTACTGGT                                           | To verify the genotype of $\Delta$ lldDE strains                                     |
| 2100   | $\Delta$ lldA-yeast1  | ggaattgtgagcggataacaattcacacaggaacagct<br>ATTTCCGTTTTCTTCCATC  | To make pLD2758 (pMQ30- $\Delta$ lldA) by gap repair cloning in yeast strain InvSc1  |
| 2101   | $\Delta$ lldA-yeast2  | tatcgcggtagcttcccgg GTCTTCGATATCGGTGATGACG                     | To make pLD2758 (pMQ30- $\Delta$ lldA) by gap repair cloning in yeast                |

|      |                      |                                                               |                                                                                          |
|------|----------------------|---------------------------------------------------------------|------------------------------------------------------------------------------------------|
|      |                      |                                                               | strain InvSc1                                                                            |
| 2102 | $\Delta$ lldA-yeast3 | cgctcatcaccgatatcgaagac CCGGGAAGCTACCCGCGATA                  | To make pLD2758 (pMQ30- <i>lIdA</i> ) by gap repair cloning in yeast strain InvSc1       |
| 2103 | $\Delta$ lldA-yeast4 | aggcaaatctgtttatcagaccgctctcgcttctgat<br>TAACCTGGCAGAAGTGAACG | To make pLD2758 (pMQ30- <i>lIdA</i> ) by gap repair cloning in yeast strain InvSc1       |
| 2104 | $\Delta$ lldA-check1 | GACGCGGTATCCCTGATCT                                           | To verify the genotype of <i>lIdA</i> strains                                            |
| 2105 | $\Delta$ lldA-check2 | ACCTGCTGGAAAAGCTTCGAC                                         | To verify the genotype of <i>lIdA</i> strains                                            |
| 2106 | $\Delta$ lldA-check3 | GACTGAAACGGCGGAATTT                                           | To verify the genotype of <i>lIdA</i> strains                                            |
| 2107 | $\Delta$ lldA-check4 | CTCATCGGACTGAAGGGAGA                                          | To verify the genotype of <i>lIdA</i> strains                                            |
| 2340 | PldhA-F              | acgtacgtacactagtGGCATGGACGACTACCTGAC                          | To make pLD3094 (pSEK103- <i>ldhAp</i> ) by restriction-ligation                         |
| 2341 | PldhA-R              | acgtacgtacaattcGGTCAGAGTTCGCTGGAGTC                           | To make pLD3094 (pSEK103- <i>ldhAp</i> ) by restriction-ligation                         |
| 2179 | PgacS-F              | acgtacgtacactagtACCAGGTCACCTCGAAACC                           | To make pLD2814 (pSEK103- <i>gacSp</i> ) by restriction-ligation                         |
| 2180 | PgacS-R              | acgtacgtacctegagACGTCTCTCCGTCGAGCCAGAT                        | To make pLD2814 (pSEK103- <i>gacSp</i> ) by restriction-ligation                         |
| 2146 | PlldP-F              | acgtacgtacactagtCGACACCCTTACCCGAAGT                           | To make pLD2797 (pSEK103- <i>lldPp</i> ) by restriction-ligation                         |
| 2147 | PlldP-R              | acgtacgtacctegaGGGTTGGCTCCCTAATTGTT                           | To make pLD2797 (pSEK103- <i>lldPp</i> ) by restriction-ligation                         |
| 2203 | PlldA-F              | acgtacgtacactagtTGCTCGATTTGGGCATGA                            | To make pLD2867 (pSEK103- <i>lldAp</i> ) by restriction-ligation                         |
| 2204 | PlldA-R              | acgtacgtacctegagGCAGTCCACTCCTTCGGG                            | To make pLD2867 (pSEK103- <i>lldAp</i> ) by restriction-ligation                         |
| 2213 | lldDE-comp-yeast1    | ggaattgtgagcggataacaattcacacagaaacagctCCTACAGCTTCG<br>GCGAGAT | To make pLD2903 (pMQ30- <i>lldDE-comp</i> ) by gap repair cloning in yeast strain InvSc1 |
| 2214 | lldDE-comp-yeast2    | ACGGTCTCGAGAAAAGGGAAT                                         | To make pLD2903 (pMQ30- <i>lldDE-comp</i> ) by gap repair cloning in yeast strain InvSc1 |
| 2215 | lldDE-comp-yeast3    | CGCCAGAAAAGCCTGAAA                                            | To make pLD2903 (pMQ30- <i>lldDE-comp</i> ) by gap repair cloning in yeast strain InvSc1 |
| 2216 | lldDE-comp-yeast4    | CGGCCTTTTCCAGCAGAC                                            | To make pLD2903 (pMQ30- <i>lldDE-comp</i> ) by gap repair cloning in yeast strain InvSc1 |
| 2217 | lldDE-comp-yeast5    | GGCCACGGGTGGTCTATC                                            | To make pLD2903 (pMQ30- <i>lldDE-comp</i> ) by gap repair cloning in yeast strain InvSc1 |
| 2218 | lldDE-comp-yeast6    | aggcaaatctgtttatcagaccgctctcgcttctgatTCCGGCGGATAGAA<br>ATAGAA | To make pLD2903 (pMQ30- <i>lldDE-comp</i> ) by gap repair cloning in yeast strain InvSc1 |
